# Supplementary material for: Database Mining of Genes of Prognostic Value for the Prostate Adenocarcinoma Microenvironment Using the Cancer Gene Atlas
Source: Hindawi journal article supplement (doi:10.1155/2020/5019793), 2020-01-01
Supplement: f1 [file 5019793.f1.zip]

Supplementary Table1. Clinical data of prostate adenocarcinoma (PRAD) obtained from The Cancer Genome Atlas

| Characteristic               | Total        |
|------------------------------|--------------|
| Cohort size <sup>a</sup> , n | 490          |
| Age, years                   | 41–78        |
| T stage, n (%)               |              |
| pT2                          | 187 (38.16%) |
| pT3                          | 286(58.37%)  |
| pT4                          | 10 (2%)      |
| Unknown                      | 7 (1.42%)    |
| N stage, n (%)               |              |
| N0                           | 340 (69.39%) |
| N1                           | 78 (15.92%)  |
| Unknown                      | 72 (14.69%)  |

<sup>a</sup>Clinical data of three patients with PRAD were not available.
