# Supplementary material for: Database Mining of Genes of Prognostic Value for the Prostate Adenocarcinoma Microenvironment Using the Cancer Gene Atlas
Source: Hindawi journal article supplement (doi:10.1155/2020/5019793), 2020-01-01
Supplement: f1 [file 5019793.f1.zip]

Supplementary Table4. survival analyses between patients' overall survival and DEG expression levels associated with stromal scores

|         | Kaplan-Meier survival analysis |       |         | Multivariate survival analysis |              |               |         |
|---------|--------------------------------|-------|---------|--------------------------------|--------------|---------------|---------|
|         | Cutoff                         | Chisq | P value | OR                             | 2.5%CI       | 97.5%CI       | P value |
| C7      | 10.07                          | 18.53 | <0.01   | <0.01                          | <0.01        | <0.01         | <0.01   |
| MLC1    | 0.14                           | 8.49  | <0.01   | 0.25                           | 0.08         | 0.84          | 0.02    |
| EPYC    | 0.02                           | 6.71  | 0.01    | 492423634.00                   | 240285131.15 | 1009138743.46 | <0.01   |
| FAM162B | 1.04                           | 12.09 | <0.01   | 0.12                           | 0.02         | 0.93          | 0.04    |
| CAMK1G  | 0.42                           | 9.07  | <0.01   | 0.25                           | 0.07         | 0.84          | 0.02    |
| PAX5    | 0.11                           | 7.37  | 0.01    | 0.12                           | 0.02         | 0.70          | 0.02    |
| TCEAL5  | 0.49                           | 12.20 | <0.01   | 0.12                           | 0.02         | 0.64          | 0.01    |
