# Supplementary material for: Database Mining of Genes of Prognostic Value for the Prostate Adenocarcinoma Microenvironment Using the Cancer Gene Atlas
Source: Hindawi journal article supplement (doi:10.1155/2020/5019793), 2020-01-01
Supplement: f1 [file 5019793.f1.zip]

Supplementary Table2. Linear regression model and correlation analyses between immune/stromal scores, overall survival and potential confounders.

|                  | StromalScore |         |                         |         | ImmuneScore |         |                         |         |
|------------------|--------------|---------|-------------------------|---------|-------------|---------|-------------------------|---------|
|                  | T value      | P value | Correlation coefficient | P value | T value     | P value | Correlation coefficient | P value |
| T clinical stage | 2.92         | <0.01   | 0.18                    | <0.01   | 2.26        | 0.02    | 0.14                    | <0.01   |
| Age              | 1.52         | 0.13    |                         |         | 1.89        | 0.06    |                         |         |
| Sample size      | 0.41         | 0.69    |                         |         | -0.51       | 0.61    |                         |         |
