# Supplementary material for: Database Mining of Genes of Prognostic Value for the Prostate Adenocarcinoma Microenvironment Using the Cancer Gene Atlas
Source: Hindawi journal article supplement (doi:10.1155/2020/5019793), 2020-01-01
Supplement: f1 [file 5019793.f1.zip]

Supplementary Table3. survival analyses between patients' overall survival and DEG expression levels associated with immune scores

| Kaplan-Meier survival analysis |        |       |         | Multivariate survival analysis |              |               |         |
|--------------------------------|--------|-------|---------|--------------------------------|--------------|---------------|---------|
|                                | Cutoff | Chisq | P value | OR                             | 2.5%CI       | 97.5%CI       | P value |
| C6                             | 0.04   | 8.08  | <0.01   | 0.13                           | 0.02         | 1.00          | 0.04    |
| S100A12                        | 0.10   | 4.42  | 0.04    | 0.24                           | 0.06         | 1.00          | 0.04    |
| MLC1                           | 0.14   | 5.78  | 0.02    | 0.25                           | 0.08         | 0.84          | 0.02    |
| EPYC                           | 0.02   | 8.76  | <0.01   | 492423642.31                   | 240285146.81 | 1009138711.77 | <0.01   |
| PAX5                           | 0.11   | 8.97  | <0.01   | 0.12                           | 0.02         | 0.70          | 0.02    |

Note: OR, odds ratio, CI, confidence interval
