# Supplementary material for: Database Mining of Genes of Prognostic Value for the Prostate Adenocarcinoma Microenvironment Using the Cancer Gene Atlas
Source: Biomed Res Int. 2020 May 18;2020:5019793. doi: 10.1155/2020/5019793 (PMC7251429; doi:10.1155/2020/5019793)
Supplement: Supplementary Materials — Supplementary Table 1: clinical data of prostate adenocarcinoma (PRAD) obtained from The Cancer Genome Atlas. Supplementary Table 2: linear regression model and correlation analyses between immune/stromal scores, overall survival, and potential confounders. Supplementary Table 3: survival analyses between patients' overall survival and DEG expression levels associated with immune scores. Supplementary Table 4: survival analyses between patients' overall survival and DEG expression levels associated with stromal scores. [file 5019793.f1.zip]

Archive with 4 entries (4 files):
- 5019793.f1.pdf
- 5019793.f2.pdf
- 5019793.f3.pdf
- 5019793.f4.pdf
